# Supplementary material for: Laminated thin-film Teflon chips for petrochemical applications
Source: Royal Society of Chemistry journal article supplement (doi:10.1039/c2lc40932a), 2012-01-01
Supplement: c2lc40932a.pdf [file c2lc40932a.pdf]

Cite this: DOI: 10.1039/c0xx00000x

www.rsc.org/xxxxxx

## SUPPLEMENTARY MATERIAL

### Laminated thin-film Teflon chips for petrochemical applications

Thomas W. de Haas, Hossein Fadaei and David Sinton\*

Received (in XXX, XXX) Xth XXXXXXXXXX 20XX, Accepted Xth XXXXXXXXXX 20XX

DOI: 10.1039/b000000x

#### 5 Port Fabrication

A number of out-of-plane port options are available in the literature.<sup>1,2,3</sup> For these chips magnetic connectors worked well for testing at low pressure with non-solvent liquids<sup>1</sup> and mechanical compression fittings were applied for solvents and/or  
10 when high temperatures or pressures were required<sup>3</sup>. To fabricate the compression fittings an O-ring groove was machined into a 3.2mm (1/8") thick FEP sheet and a 1mm hole was drilled and tapped into the sheet to allow for the 1mm threaded stainless steel inlet tubing, similar to the method  
15 outlined by Chen et al.<sup>2</sup> Compression fittings were assembled by compressing a Viton O-ring between the FEP sheet and the chip's inlet port using bolted aluminium plates.

#### Materials

The FEP films used were from DuPont 127µm (0.005"),  
20 50.8µm (0.002") and 25.4µm (0.001") (McMaster Carr #85905K62, 85905K64, 85905K66 respectively). The PFA films were also from Dupont 127µm (0.005"), 50.8µm (0.002") and 25.4µm (0.001") (McMaster Carr #84955K26, 84955K24, 84955K22 respectively). The film was cut using a 30W Universal  
25 Laser Systems M-360 CNC laser cutting system. Layers were bonded in a Fisher Scientific Isotemp Model 281A Vacuum Oven (at atmospheric pressure) located in a fume hood to remove gasses released during processing of the Teflon. The viscosity of the 80% toluene mixture was verified using a cone and plate  
30 rheometer, Advanced Rheometer AR2000, with a 60 mm 0.5° cone. Heavy oil samples were obtained from Suncor. ACS reagent grade ≥99.5% toluene from Sigma-Aldrich was used.

#### References

1. J. Atencia, G. a Cooksey, A. Jahn, J. M. Zook, W. N. Vreeland, and  
35 L. E. Locascio, *Lab on a chip*, 2010, **10**, 246-9.
2. C. F. Chen, J. Liu, L. P. Hromada, C. W. Tsao, C. C. Chang, and D. L. DeVoe, *Lab on a chip*, 2009, **9**, 50-5.
3. S. Marre, A. Adamo, S. Basak, C. Aymonier, and K. F. Jensen, *Society*, 2010, 11310-11320.

40
